# Supplementary material for: Deciphering the genetic code of neuronal type connectivity through bilinear modeling
Source: eLife. 2024 Jun 10;12:RP91532. doi: 10.7554/eLife.91532 (PMC11164534; doi:10.7554/eLife.91532)
Supplement: Supplementary file 1. [file elife-91532-supp1.xlsx]

## Sheet: Sheet1
Shekhar et al. (2016)	Greene et al. (2016)
BC1a, BC1b	bc1
BC2	bc2
BC3a	bc3a
BC4	bc4
BC5a	bc5i
BC5b	bc5o
BC5c	bc5t
BC5d	(bc5)xbc
BC6	bc6
BC7	bc7
BC8, BC9	bc8/9
