# Supplementary material for: Deciphering the genetic code of neuronal type connectivity through bilinear modeling
Source: eLife. 2024 Jun 10;12:RP91532. doi: 10.7554/eLife.91532 (PMC11164534; doi:10.7554/eLife.91532)
Supplement: Supplementary file 2. [file elife-91532-supp2.xlsx]

## Sheet: Sheet2
Goetz et al. (2022) Type	Bae et al. (2018) Eyewire Type	Tran et al. (2019) Cluster
ON sus alpha	8w	C43
OFFhOS	2aw	C9
OFFvOS	2aw	C5
ON tr SmRF	6sn	C30
OFF tr alpha	4ow	C45
OFF tr SmRF	4i	C21
ONhOS SmRF	82wi	C27
ONhOS LgRF	82n/wo	C36
ONvOS SmRF	72	C38
ON DS sus DN	7iv	C10
ON DS sus T	7ir	C10
ON DS sus V	7id	C10
OODS D	37v	C16
OODS T	37r	C24
HD1	5si	C13
HD2	5so	C6
UHD	5ti	C2
LED	51	C11
F-mini-ON	63	C3
ON delayed	73	C14
ON bursty	3i	C18
bSbC	2o	C25
sSbC EW27	27	C26
