# Supplementary material for: Deciphering the genetic code of neuronal type connectivity through bilinear modeling
Source: eLife. 2024 Jun 10;12:RP91532. doi: 10.7554/eLife.91532 (PMC11164534; doi:10.7554/eLife.91532)
Supplement: Supplementary file 3. [file elife-91532-supp3.xlsx]

## Sheet: Sheet3
Goetz et al. (2022) Type	Bae et al. (2018) Eyewire Type	Tran et al. (2019) Cluster
M2	9w	C31
OFF sus alpha	1wt	C42
OODS N	37c	C12
F-mini-OFF	2an	C4
ON tr alpha	6sw	C41
