# Supplementary material for: Deciphering the genetic code of neuronal type connectivity through bilinear modeling
Source: eLife. 2024 Jun 10;12:RP91532. doi: 10.7554/eLife.91532 (PMC11164534; doi:10.7554/eLife.91532)
Supplement: Supplementary file 4. [file elife-91532-supp4.xlsx]

## Sheet: Summary_GO_Analysis
Term Name	Term ID	Adjusted P-value	Number of Genes
BC latent dimension 1
modulation of chemical synaptic transmission	GO:0050804	0.000440326	9
regulation of trans-synaptic signaling	GO:0099177	0.000445672	9
synaptic signaling	GO:0099536	0.000504129	10
nervous system development	GO:0007399	0.000591482	15
neuron differentiation	GO:0030182	0.000776891	12
generation of neurons	GO:0048699	0.0012934	12
cell-cell adhesion via plasma-membrane adhesion molecules	GO:0098742	0.00325594	6
chemical synaptic transmission	GO:0007268	0.00352989	9
anterograde trans-synaptic signaling	GO:0098916	0.00352989	9
trans-synaptic signaling	GO:0099537	0.00376334	9
RGC latent dimension 1
system development	GO:0048731	1.14e-05	21
nervous system development	GO:0007399	1.53e-05	17
anatomical structure development	GO:0048856	1.67e-05	25
synapse	GO:0045202	3.22e-05	13
somatodendritic compartment	GO:0036477	3.61e-05	11
multicellular organism development	GO:0007275	3.76e-05	22
synaptic membrane	GO:0097060	4.9e-05	8
postsynaptic membrane	GO:0045211	5.92e-05	7
neurogenesis	GO:0022008	0.000126449	14
developmental process	GO:0032502	0.000135356	25
BC latent dimension 2
neuron differentiation	GO:0030182	1.07e-08	17
generation of neurons	GO:0048699	2.28e-08	17
neuron development	GO:0048666	9.3e-08	15
neurogenesis	GO:0022008	1.98e-07	17
neuron projection development	GO:0031175	2.18e-07	14
cell adhesion	GO:0007155	7e-07	15
synaptic membrane	GO:0097060	6.2e-06	9
cell periphery	GO:0071944	8.75e-06	27
plasma membrane	GO:0005886	1.07e-05	26
nervous system development	GO:0007399	2.36e-05	17
RGC latent dimension 2
neuron projection development	GO:0031175	0.00289625	10
nervous system development	GO:0007399	0.00563224	14
neuron projection morphogenesis	GO:0048812	0.0067497	8
neurogenesis	GO:0022008	0.00734347	12
plasma membrane bounded cell projection morphogenesis	GO:0120039	0.00789142	8
neuron differentiation	GO:0030182	0.00817177	11
cell projection morphogenesis	GO:0048858	0.008392	8
neuron development	GO:0048666	0.00937721	10
synaptic membrane	GO:0097060	0.00944134	6
cell part morphogenesis	GO:0032990	0.0114306	8
