# Supplementary material for: Deciphering the genetic code of neuronal type connectivity through bilinear modeling
Source: eLife. 2024 Jun 10;12:RP91532. doi: 10.7554/eLife.91532 (PMC11164534; doi:10.7554/eLife.91532)
Supplement: Supplementary file 5. [file elife-91532-supp5.xlsx]

## Sheet: Sheet1
Tran et al. (2019)	Predicted BC Partners	Based on Goetz et al. (2022) Figure 5A	Consistent
C1: W3L1	bc5o, bc5xbc, bc5t	Match to 6 functional types
C15	bc2, bc1, bc8/9
C17	bc2, bc1, bc4
C19	bc5o, bc5xbc, bc5t	"HD2" like: Between ChAT bands	Yes
C20	bc6, bc8/9, bc7
C22: MX	bc6, bc8/9, bc7	"M2" like: ON, Sustained	Yes
C23: W3D2	bc5o, bc5xbc, bc5t	"OFF tr alpha" like: OFF, Transient	No
C28: F-midi-OFF	bc2, bc1, bc4	Match to 3 functional types
C29	bc2, bc1, bc4	"OFF sus alpha" like: OFF, Sustained	Yes
C32	bc2, bc4, bc1	Match to 2 funcitonal types
C33: M1a	bc6, bc8/9, bc7	"M2" like: ON, Sustained	Yes
C34	bc5o, bc5xbc, bc5t	"ON tr MeRF" like: ON, Transient	Yes
C35	bc2, bc1, bc4	Match to 4 functional types
C37	bc2, bc1, bc4	"OFF tr MeRF" like: OFF, Transient	Yes
C39	bc4, bc3a, bc3b
C40: M1b	bc6, bc8/9, bc7	"M1": ON, Sustained	Yes
C44	bc6, bc8/9, bc7	"LED" like: Between ChAT bands	No
C7	bc5o, bc5i, bc5xbc
C8	bc6, bc8/9, bc7	"PixON" like: ON, Sustained	Yes
